# Supplementary figures and images for: Phosphatidic acid modulation of Kv channel voltage sensor function
Source: eLife journal article supplement (doi:10.7554/elife.04366), 2014-10-06

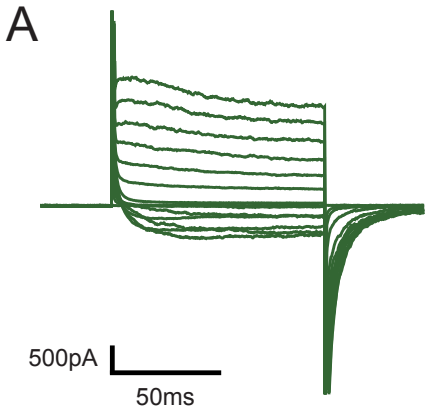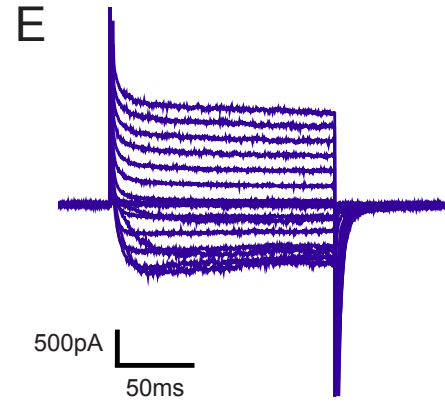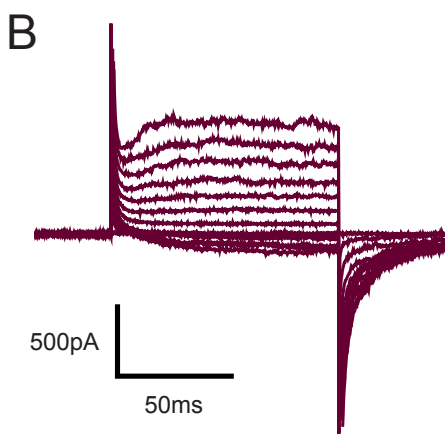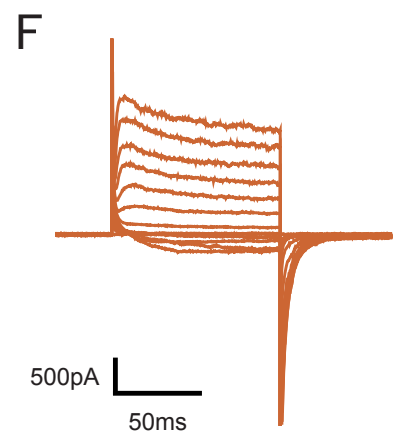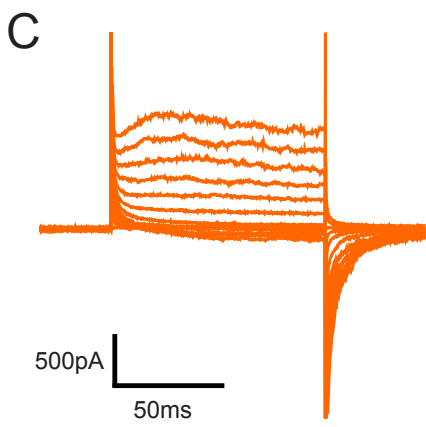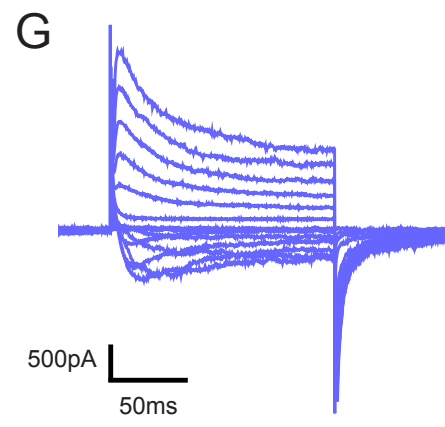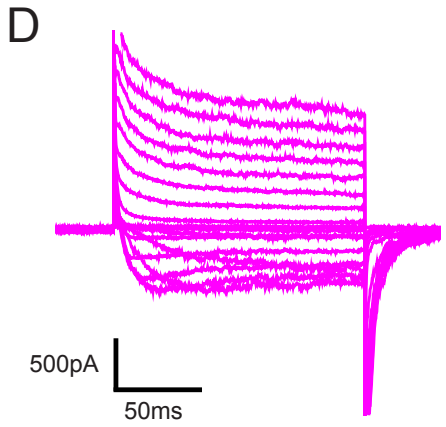

Supplement: supp [file elife-04366-supp-v1.zip]

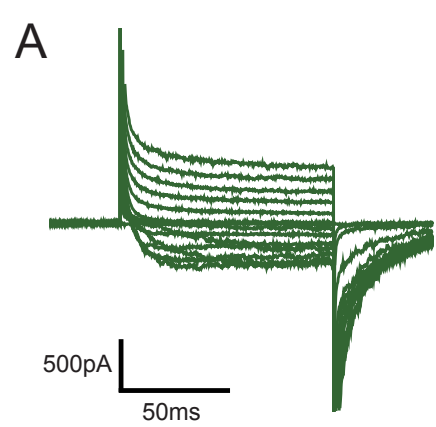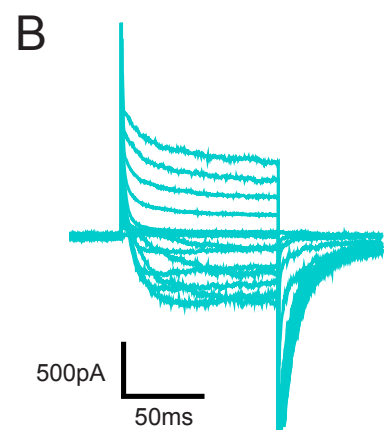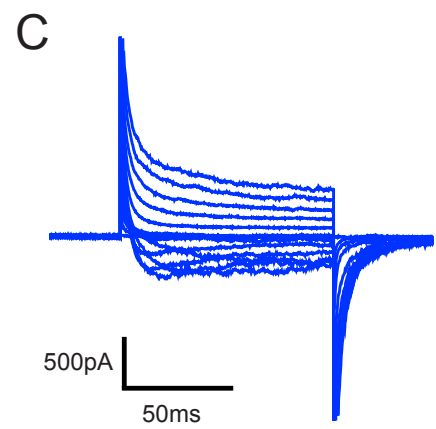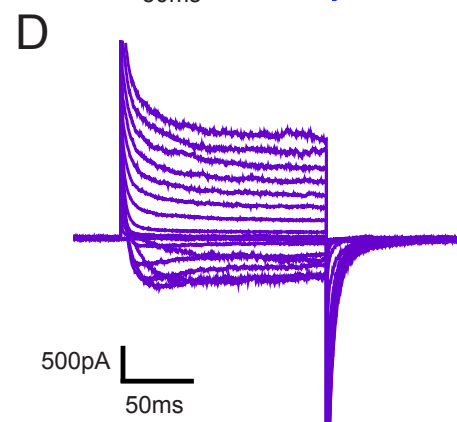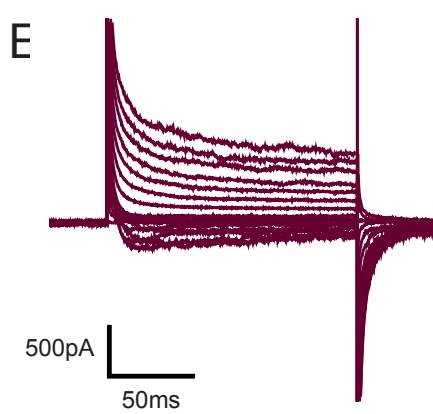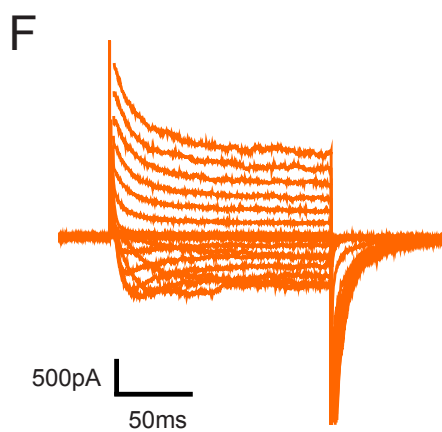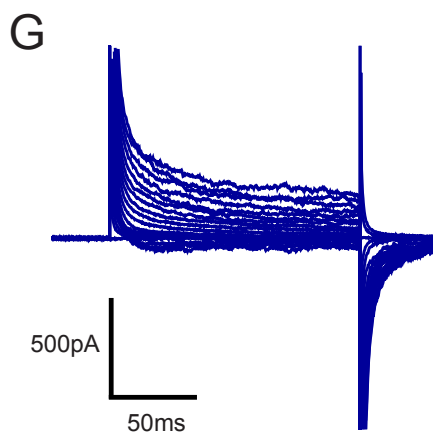

Supplement: supp [file elife-04366-supp-v1.zip]

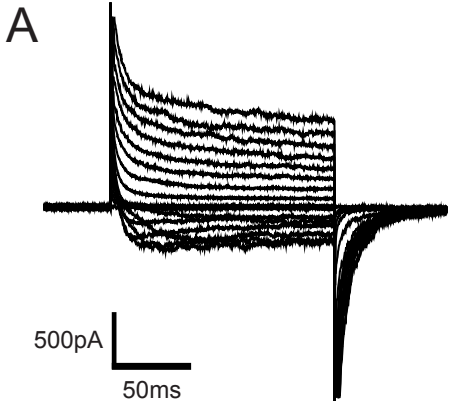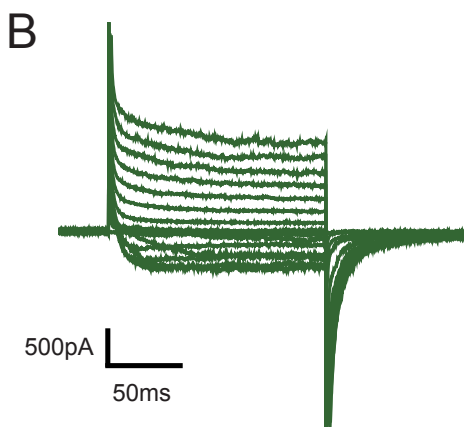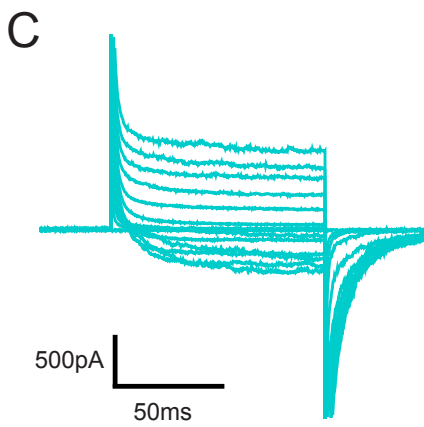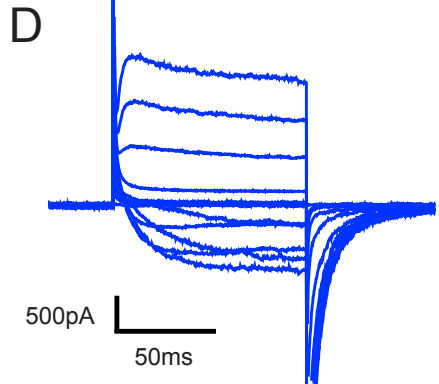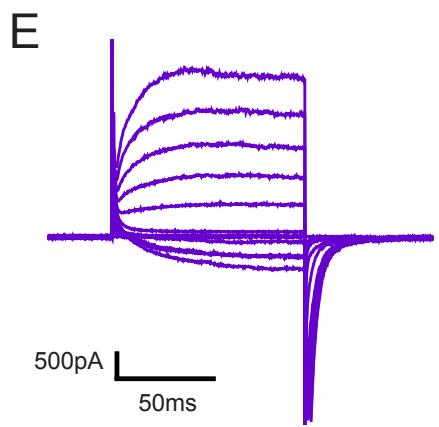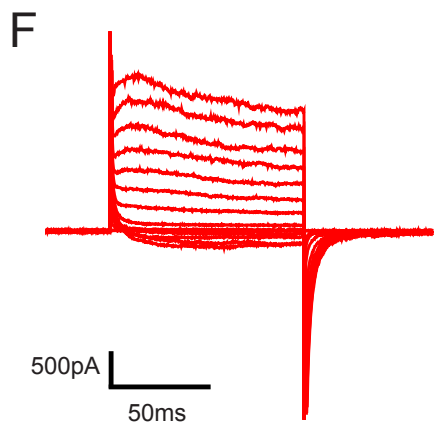

Supplement: supp [file elife-04366-supp-v1.zip]

A

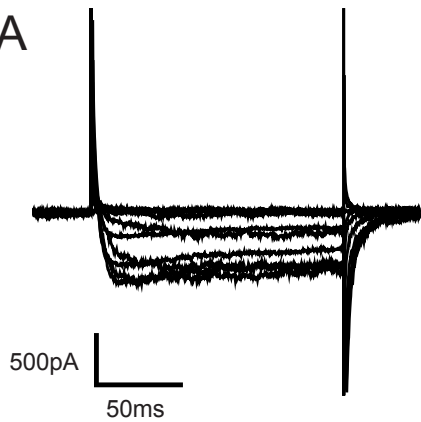

B

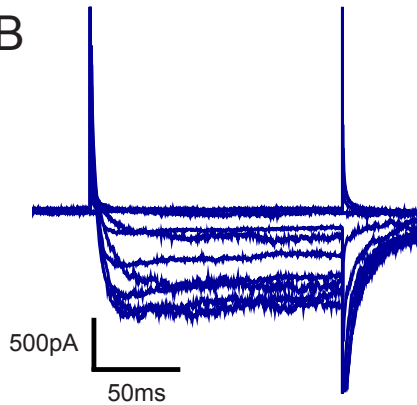

C

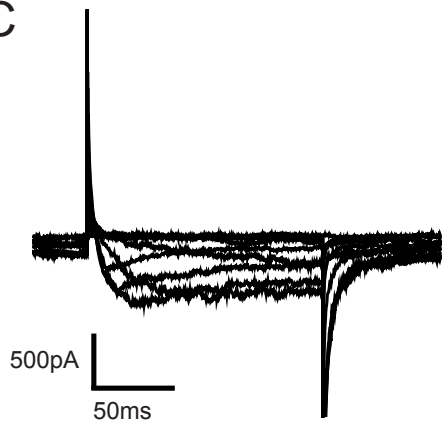

D

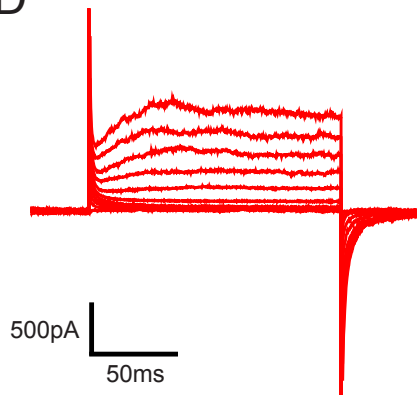

Supplement: supp [file elife-04366-supp-v1.zip]

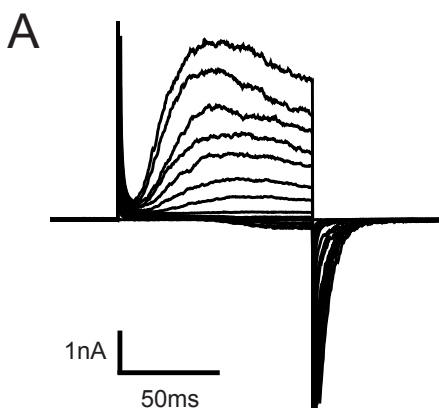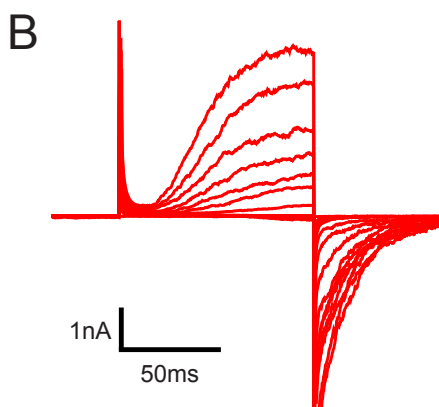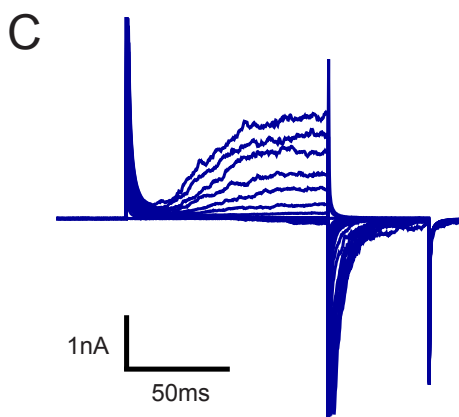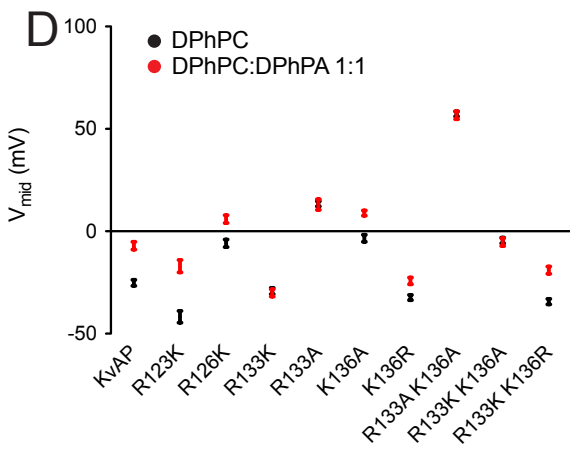

Supplement: supp [file elife-04366-supp-v1.zip]
